# Supplementary material
Source: Springer Nature journal article supplement (https://www.springermedizin.de/resource/supplementary/12889_2009_2062_MOESM3_ESM.pdf/9484474)

### Women

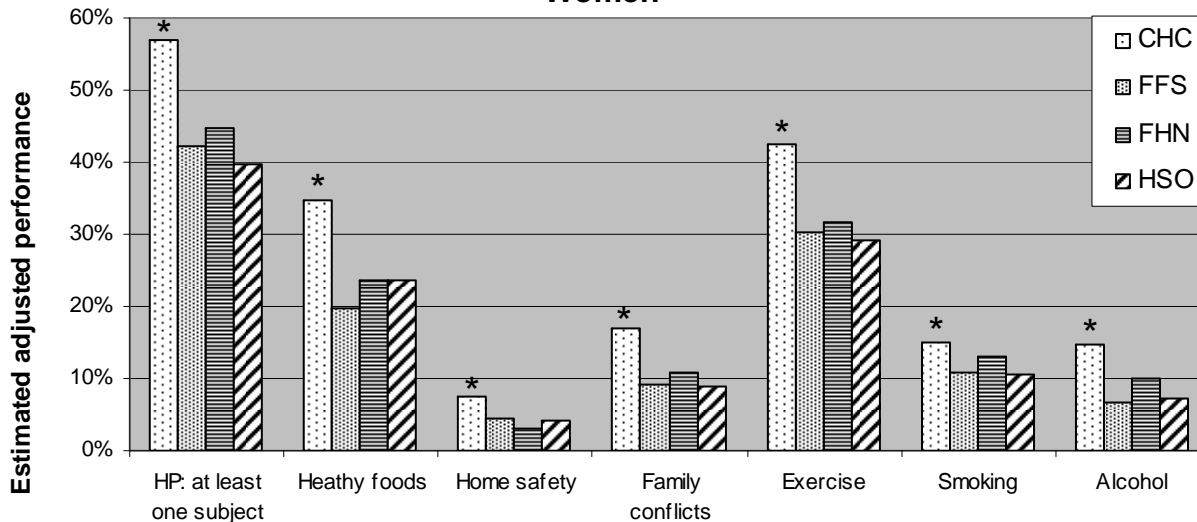

### Men

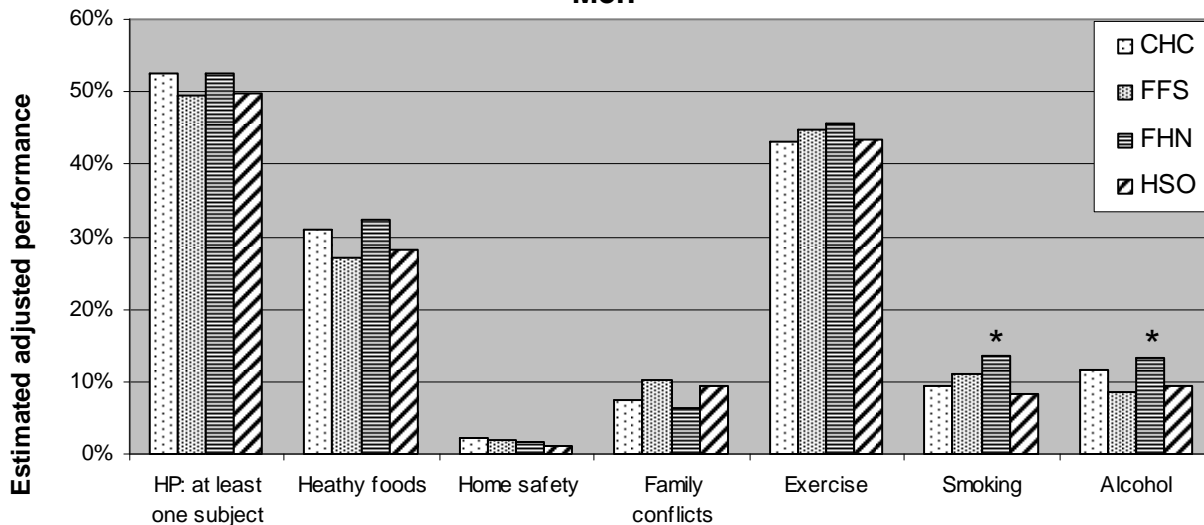

Supplement: MOESM3 [file 9484474]
